# Supplementary figures and images for: A novel metal–organic framework based on bismuth and trimesic acid: synthesis, structure and properties
Source: Royal Society of Chemistry journal article supplement (doi:10.1039/c5dt03111g), 2015-01-01

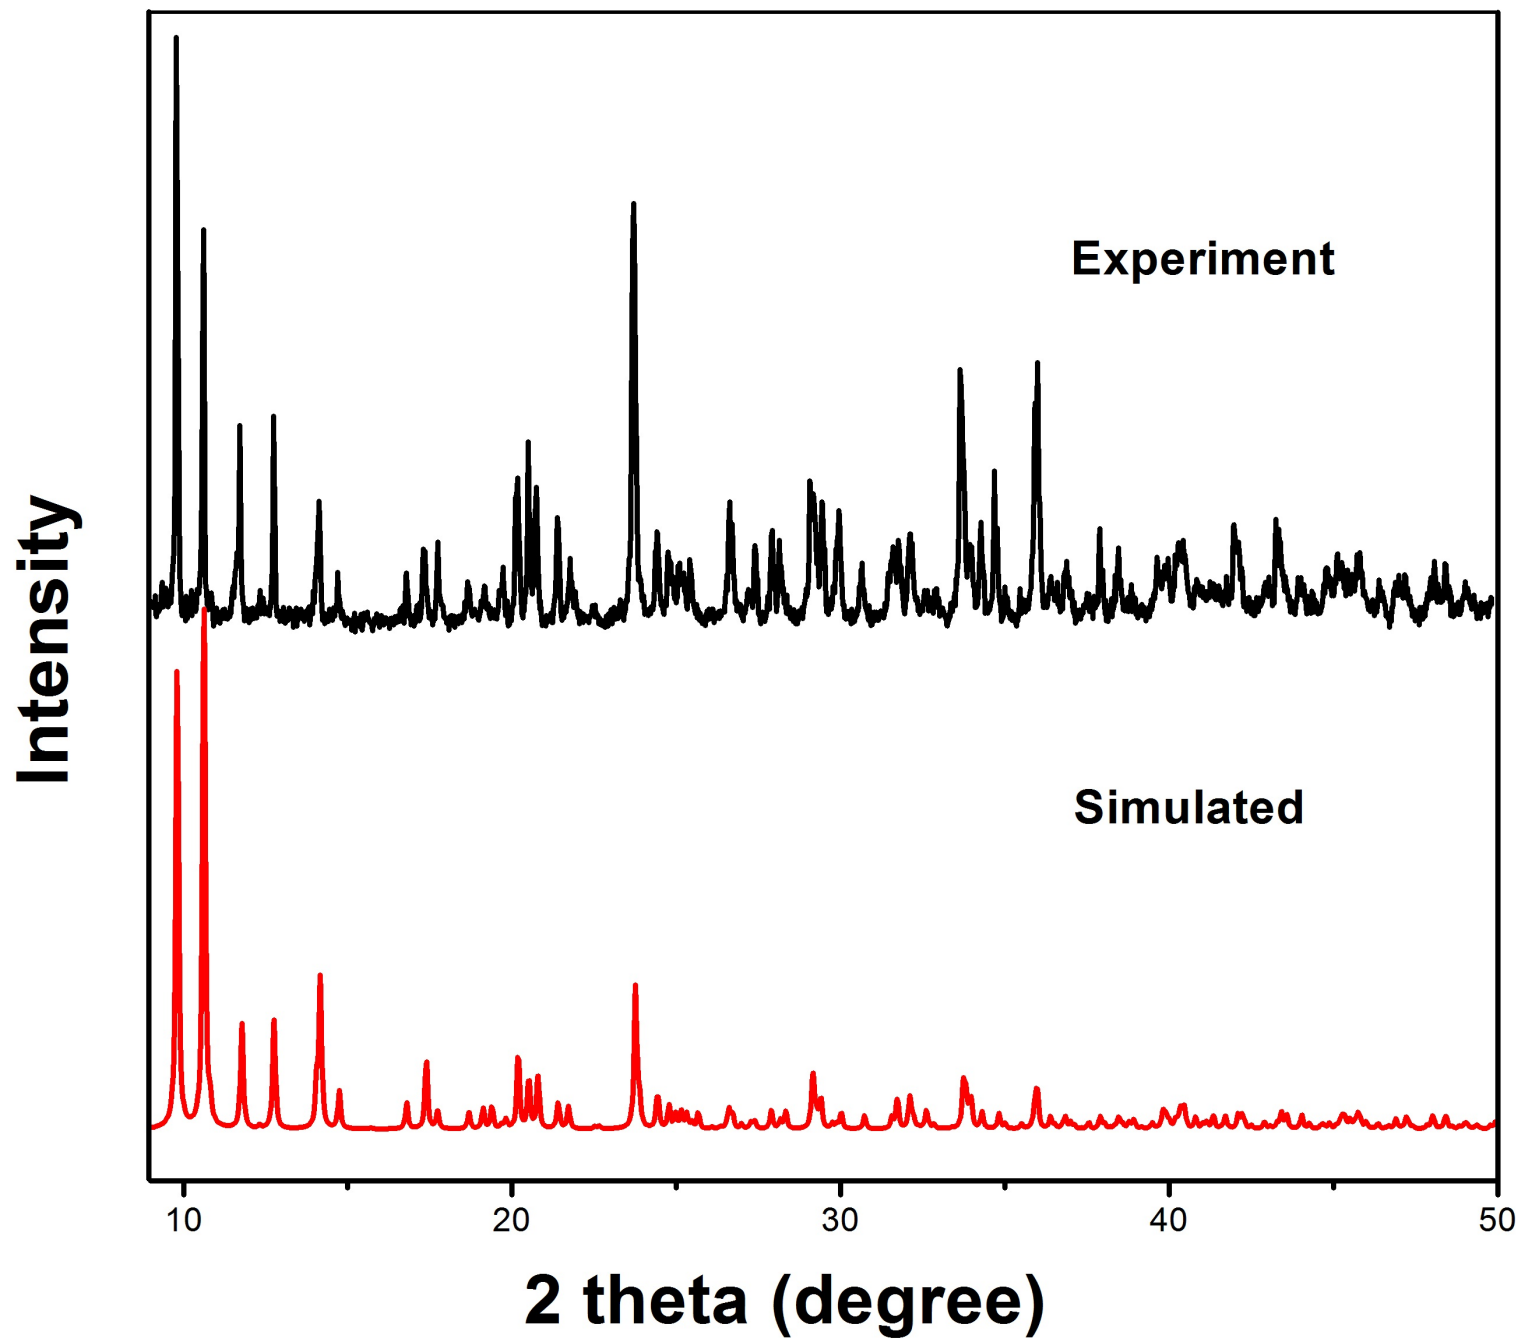

Supplement: c5dt03111g3.pdf [file c5dt03111g3.pdf]
